# Supplementary material for: Mutation status coupled with RNA-sequencing data can efficiently identify important non-significantly mutated genes serving as diagnostic biomarkers of endometrial cancer
Source: BMC Bioinformatics. 2017 Dec 28;18(Suppl 14):472. doi: 10.1186/s12859-017-1891-6 (PMC5751793; doi:10.1186/s12859-017-1891-6)
Supplement: Supplementary file 3 — Summary of 4 SMGs showed different expression patterns in the groups of histological grade patients. (XLSX 8 kb) [file 12859_2017_1891_MOESM3_ESM.xlsx]

## Sheet: Sheet1
Additional file 3 - Summary of 4 SMGs showed different expression patterns in the groups of histological grade patients.
Gene symbol	Description	p value (t-test)	FDR	Fold change
DNER	delta/notch like EGF repeat containing	7.32629e-06	8.93943e-07	4.97227
PIK3CA	phosphatidylinositol-4,5-bisphosphate 3-kinase catalytic subunit alpha	2.01808e-05	2.08252e-06	2.11624
SLC1A3	solute carrier family 1 member 3	6.88492e-06	8.48689e-07	2.15742
TPX2	TPX2, microtubule nucleation factor	1.02306e-24	3.69502e-23	2.53384
